# Supplementary material for: The Impact of Device Settings, Use Patterns, and Flavorings on Carbonyl Emissions from Electronic Cigarettes
Source: PubMed Central journal article supplement (PMC7460324; doi:10.3390/ijerph17165650), 2020-08-05
Supplement: ijerph-17-05650-s001.pdf [file ijerph-17-05650-s001.pdf]

## Supplementary material

### 1. Demographics of the study participants

The demographics of the study participants are summarized in Table S1.

**Table S1.** Summary of the study participants.

|                             |                                      |
|-----------------------------|--------------------------------------|
| Number of subject           | 23                                   |
| Age                         | 25 ± 10 (18-52) years                |
| Gender                      | 21 men and 2 women                   |
| Ethnicity                   | 16 White; 1 Black; 3 Asian; 6 others |
| Duration of E-cigarette use | 1.4 ± 0.9 (0.4-4.0) years            |

### 2. E-cigarette use patterns of the 23 subjects in our study

Table S3 shows the mean, the standard deviation, and the range of e-cigarette vaping topography, device power output, and nicotine contents of the 23 subjects in our study. E-cigarette device power output ranged from 5-watt to 59.7-watt, with an average power output of 13.7-watt. The average nicotine content in e-liquids was 11.9 ± 10.0 mg/mL, with a maximum nicotine level of 36 mg/ml. Most subjects used VG-based e-liquids (14 out of 23 subjects), followed by PG:VG mixed e-liquid (7 subjects), and PG-based e-liquid (2 subjects).

**Table S2.** E-cigarette vaping patterns from the study subjects (N = 23).

| Parameters          | Mean   | Standard Deviation | Percentiles |       |       |       |        |        |        |
|---------------------|--------|--------------------|-------------|-------|-------|-------|--------|--------|--------|
|                     |        |                    | Min         | 10    | 25    | 50    | 75     | 90     | Max    |
| Puff volume (mL)    | 100.17 | 55.57              | 9.99        | 38.39 | 63.58 | 90.04 | 135.62 | 160.46 | 251.13 |
| Puff duration (sec) | 3.69   | 1.16               | 1.26        | 2.08  | 3.24  | 3.85  | 4.24   | 5.06   | 5.77   |
| Puff interval (sec) | 24.30  | 17.30              | 8.01        | 11.90 | 13.86 | 18.67 | 26.35  | 67.91  | 69.39  |
| Power (W)           | 13.70  | 15.14              | 5.00        | 5.48  | 6.26  | 7.61  | 12.96  | 27.38  | 59.67  |
| Nicotine (mg/mL)    | 11.92  | 10.04              | 0.00        | 3.00  | 3.00  | 12.00 | 19.50  | 24.00  | 36.00  |

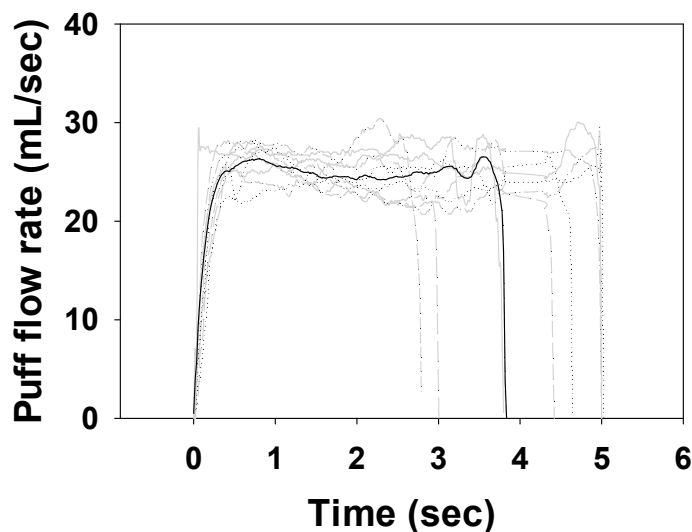

Figure S1. E-cigarette vaping topography observed from 23 e-cigarette users.

### 3. Chemical components of flavoring ingredients used in e-liquids (provided by the vendor/manufacturer)

The chemical components of the flavoring ingredients were only partially released by the vendors/manufactures. The strawberry (ripe), dragon fruit, menthol, and sweet cream flavors consist of natural/artificial flavors in propylene glycol (PG). The Bavarian cream flavor consists of natural/artificial flavors, PG, and water. The cinnamon flavor is composed of artificial flavors in ethyl alcohol. The bubblegum (fruity) flavor consists of natural/artificial flavors in PG and ethyl alcohol. The graham cracker flavor is composed of natural/artificial flavor in PG and water, with caramel color, corn syrup, ethyl alcohol, and salt.

### 4. The carbonyl sampling system

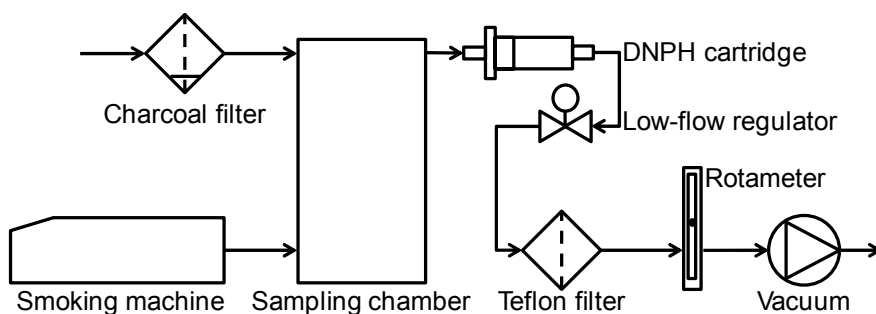

Figure S2. Scheme of the carbonyl sampling system

## 5. Carbonyl calibration table

**Table S3.** Retention times, calibration parameters, LODs, and LOQs for the selected carbonyls.

| Chemical                | Time (min) | Range (ng/ $\mu$ l) | Calibration parameters <sup>†</sup> |        | R <sup>2</sup> | LOD (ng/30 puff) <sup>††</sup> | LOQ (ng/30 puff) <sup>††</sup> |
|-------------------------|------------|---------------------|-------------------------------------|--------|----------------|--------------------------------|--------------------------------|
|                         |            |                     | a                                   | b      |                |                                |                                |
| Glyoxal                 | 4.4        | 0.1–10.0            | 3.712 $\times$ 10 <sup>-6</sup>     | 0.1127 | 0.9982         | 49.6                           | 165.4                          |
| Formaldehyde            | 4.9        | 0.1–20.0            | 3.417 $\times$ 10 <sup>-6</sup>     | 0.1052 | 0.9981         | 31.1                           | 103.7                          |
| Acetaldehyde            | 7.3        | 0.1–10.0            | 4.796 $\times$ 10 <sup>-6</sup>     | 0.1351 | 0.9990         | 22.4                           | 74.8                           |
| Diacetyl                | 8.3        | 0.1–10.0            | 1.654 $\times$ 10 <sup>-6</sup>     | 0.0981 | 0.9981         | 11.1                           | 36.9                           |
| Acetone                 | 10.8       | 0.1–10.0            | 6.131 $\times$ 10 <sup>-6</sup>     | 0.0931 | 0.9947         | 25.8                           | 86.1                           |
| Vanillin                | 12.0       | 0.1–10.0            | 6.888 $\times$ 10 <sup>-6</sup>     | 0.2507 | 0.9967         | 4.58                           | 15.3                           |
| Acrolein                | 11.5       | 0.1–10.0            | 5.276 $\times$ 10 <sup>-6</sup>     | 0.1753 | 0.9957         | 10.9                           | 36.3                           |
| Propionaldehyde         | 12.8       | 0.1–10.0            | 4.655 $\times$ 10 <sup>-6</sup>     | 0.3606 | 0.9912         | 4.32                           | 14.4                           |
| Acetylpropionyl         | 13.7       | 0.1–10.0            | 1.828 $\times$ 10 <sup>-6</sup>     | 0.2324 | 0.9944         | 8.61                           | 28.7                           |
| Crotonaldehyde          | 15.8       | 0.1–10.0            | 6.869 $\times$ 10 <sup>-6</sup>     | 0.1955 | 0.9965         | 5.19                           | 17.3                           |
| <i>n</i> -Butylaldehyde | 17.7       | 0.1–10.0            | 6.744 $\times$ 10 <sup>-6</sup>     | 0.4268 | 0.9896         | 14.9                           | 49.6                           |
| Benzaldehyde            | 20.1       | 0.1–10.0            | 1.002 $\times$ 10 <sup>-5</sup>     | 0.2561 | 0.9970         | 8.58                           | 28.6                           |
| Isovaleraldehyde        | 22.0       | 0.1–10.0            | 1.045 $\times$ 10 <sup>-5</sup>     | 0.0960 | 0.9943         | 4.77                           | 15.9                           |
| <i>n</i> -Valeraldehyde | 22.8       | 0.1–10.0            | 7.352 $\times$ 10 <sup>-6</sup>     | 0.5103 | 0.9833         | 3.03                           | 10.1                           |
| <i>o</i> -Tolualdehyde  | 24.3       | 0.1–10.0            | 1.778 $\times$ 10 <sup>-5</sup>     | 0.2090 | 0.9947         | 5.04                           | 16.8                           |
| <i>p</i> -Tolualdehyde  | 24.9       | 0.1–10.0            | 4.480 $\times$ 10 <sup>-6</sup>     | 0.4780 | 0.9858         | 6.32                           | 21.1                           |
| Cinnamaldehyde          | 25.7       | 0.1–10.0            | 1.642 $\times$ 10 <sup>-5</sup>     | 0.1297 | 0.9960         | 8.11                           | 27.0                           |
| <i>n</i> -Hexaldehyde   | 28.0       | 0.1–10.0            | 1.591 $\times$ 10 <sup>-5</sup>     | 0.0620 | 0.9976         | 16.6                           | 55.2                           |
| Dimethylbenzaldehyde    | 28.8       | 0.1–10.0            | 1.248 $\times$ 10 <sup>-5</sup>     | 0.1502 | 0.9829         | 0.36                           | 1.19                           |

<sup>†</sup> a and b indicate slope and intercept of the calibration equation, respectively; <sup>††</sup> LOD and LOQ were three- and ten-times standard deviation of 0.1 ng/ $\mu$ l sample (n = 7), respectively.

## 6. E-cigarette carbonyl emissions under different usepatterns

**Table S4.** Impact of power outputs and base materials on carbonyl levels in e-vapor (mean  $\pm$  standard deviation, n = 5).

| Carbonyl                | Unit             | Base material and power output (watts) <sup>†</sup> |                      |                     |                     |                    |                     |                     |                    |                     |
|-------------------------|------------------|-----------------------------------------------------|----------------------|---------------------|---------------------|--------------------|---------------------|---------------------|--------------------|---------------------|
|                         |                  | VG                                                  |                      |                     | PG:VG (v:v=1:1)     |                    |                     | PG                  |                    |                     |
|                         |                  | 6.4W                                                | 14.7 W               | 31.3W               | 6.4W                | 14.7W              | 31.3W               | 6.4W                | 14.7W              | 31.3W               |
| Glyoxal                 | ng/<br>puff      | ND <sup>††</sup>                                    | ND <sup>††</sup>     | 240.1 $\pm$<br>13.7 | ND <sup>††</sup>    | ND <sup>††</sup>   | ND <sup>††</sup>    | ND <sup>††</sup>    | ND <sup>††</sup>   | ND <sup>††</sup>    |
| Formaldehyde            | $\mu$ g/<br>puff | 0.903 $\pm$                                         | 1.10 $\pm$           | 1.26 $\pm$          | 0.927 $\pm$         | 1.15 $\pm$         | 1.96 $\pm$          | 0.957 $\pm$         | 1.20 $\pm$         | 2.32 $\pm$          |
|                         |                  | 0.0562                                              | 0.0920               | 0.127               | 0.0474              | 0.0653             | 0.348               | 0.0288              | 0.0824             | 0.0419              |
| Acetaldehyde            | $\mu$ g/<br>puff | 0.0917 $\pm$                                        | 0.0778 $\pm$         | 0.0825 $\pm$        | 0.117 $\pm$         | 0.534 $\pm$        | 0.553 $\pm$         | 0.362 $\pm$         | 1.09 $\pm$         | 1.02 $\pm$          |
|                         |                  | 0.0181                                              | 0.044                | 0.0360              | 0.0104              | 0.0584             | 0.0853              | 0.0742              | 0.0883             | 0.0611              |
| Acetone                 | ng/<br>puff      | <LOD <sup>†††</sup>                                 | ND <sup>††</sup>     | <LOD <sup>†††</sup> | <LOD <sup>†††</sup> | ND <sup>††</sup>   | ND <sup>††</sup>    | <LOD <sup>†††</sup> | ND <sup>††</sup>   | <LOD                |
| Acrolein                | ng/<br>puff      | <LOQ <sup>††††</sup>                                | <LOQ <sup>††††</sup> | 251.6 $\pm$<br>51.9 | 42.6 $\pm$<br>6.55  | 29.2 $\pm$<br>7.81 | 199.2 $\pm$<br>14.8 | 67.3 $\pm$<br>14.8  | 97.5 $\pm$<br>62.5 | 208.9 $\pm$<br>89.6 |
|                         |                  | ND <sup>††</sup>                                    | ND <sup>††</sup>     | ND <sup>††</sup>    | ND <sup>††</sup>    | ND <sup>††</sup>   | ND <sup>††</sup>    | ND <sup>††</sup>    | ND <sup>††</sup>   | 24.0 $\pm$<br>3.74  |
| Propionaldehyde         | ng/<br>puff      | ND <sup>††</sup>                                    | ND <sup>††</sup>     | ND <sup>††</sup>    | ND <sup>††</sup>    | ND <sup>††</sup>   | ND <sup>††</sup>    | ND <sup>††</sup>    | ND <sup>††</sup>   | 24.0 $\pm$<br>3.74  |
| Crotonaldehyde          | ng/<br>puff      | 29.8 $\pm$<br>6.02                                  | ND <sup>††</sup>     | 17.7 $\pm$<br>0.08  | ND <sup>††</sup>    | ND <sup>††</sup>   | 33.6 $\pm$ 4.4      | ND <sup>††</sup>    | ND <sup>††</sup>   | 54.0 $\pm$ 12.3     |
|                         |                  | ND <sup>††</sup>                                    | ND <sup>††</sup>     | 156.1 $\pm$<br>7.82 | ND <sup>††</sup>    | 93.1 $\pm$<br>28.1 | 402.1 $\pm$<br>16.9 | 25.5 $\pm$ 2.2      | 28.4 $\pm$ 2.9     | 422.9 $\pm$<br>9.34 |
| <i>n</i> -Butylaldehyde | ng/<br>puff      | ND <sup>††</sup>                                    | ND <sup>††</sup>     | 156.1 $\pm$<br>7.82 | ND <sup>††</sup>    | 93.1 $\pm$<br>28.1 | 402.1 $\pm$<br>16.9 | 25.5 $\pm$ 2.2      | 28.4 $\pm$ 2.9     | 422.9 $\pm$<br>9.34 |
| Benzaldehyde            | ng/<br>puff      | 23.1 $\pm$<br>12.4                                  | ND <sup>††</sup>     | 27.7 $\pm$<br>1.75  | ND <sup>††</sup>    | ND <sup>††</sup>   | 31.2 $\pm$<br>2.69  | ND <sup>††</sup>    | ND <sup>††</sup>   | 31.3 $\pm$<br>2.82  |
|                         |                  | ND <sup>††</sup>                                    | ND <sup>††</sup>     | 68.1 $\pm$<br>13.5  | ND <sup>††</sup>    | ND <sup>††</sup>   | 136.9 $\pm$<br>8.21 | ND <sup>††</sup>    | ND <sup>††</sup>   | 86.4 $\pm$<br>44.3  |
| <i>n</i> -Valeraldehyde | ng/<br>puff      | 81.1 $\pm$<br>19.4                                  | ND <sup>††</sup>     | 70.7 $\pm$<br>20.0  | ND <sup>††</sup>    | 53.4 $\pm$<br>13.3 | ND <sup>††</sup>    | ND <sup>††</sup>    | ND <sup>††</sup>   | ND <sup>††</sup>    |
| <i>o</i> -Tolualdehyde  | ng/<br>puff      | ND <sup>††</sup>                                    | ND <sup>††</sup>     | ND <sup>††</sup>    | ND <sup>††</sup>    | ND <sup>††</sup>   | 198.0 $\pm$<br>15.0 | 42.0 $\pm$<br>3.80  | ND <sup>††</sup>   | 329.1 $\pm$<br>68.4 |
|                         |                  | 18.1 $\pm$<br>1.63                                  | ND <sup>††</sup>     | ND <sup>††</sup>    | ND <sup>††</sup>    | ND <sup>††</sup>   | ND <sup>††</sup>    | ND <sup>††</sup>    | ND <sup>††</sup>   | ND <sup>††</sup>    |
| <i>p</i> -Tolualdehyde  | ng/<br>puff      | 18.1 $\pm$<br>1.63                                  | ND <sup>††</sup>     | ND <sup>††</sup>    | ND <sup>††</sup>    | ND <sup>††</sup>   | ND <sup>††</sup>    | ND <sup>††</sup>    | ND <sup>††</sup>   | ND <sup>††</sup>    |

|                       |             |                  |                  |                  |                  |                  |                  |                  |                  |                  |
|-----------------------|-------------|------------------|------------------|------------------|------------------|------------------|------------------|------------------|------------------|------------------|
| <i>n</i> -Hexaldehyde | ng/<br>puff | 248.1 ±<br>65.1  | 563.1 ±<br>142.  | ND <sup>††</sup> | ND <sup>††</sup> | 54.0 ±<br>4.49   | ND <sup>††</sup> | ND <sup>††</sup> | 130.4 ±<br>34.8  | ND <sup>††</sup> |
| Dimethylbenzaldehyde  | ng/<br>puff | ND <sup>††</sup> | ND <sup>††</sup> | ND <sup>††</sup> | ND <sup>††</sup> | ND <sup>††</sup> | 31.4 ±<br>4.03   | ND <sup>††</sup> | ND <sup>††</sup> | 35.8 ±<br>3.77   |

<sup>†</sup> 1.5 mm air hole, 12 mg/ml nicotine, and 90 ml puff volume, 3.8 sec puff duration and 24 sec puff interval were used; <sup>††</sup> ND indicates non-detected; <sup>†††</sup> <LOD indicates the measurement which is below the detection limit; <sup>††††</sup> <LOQ indicates the measurement which is below the quantification limit.

**Table S5.** Impact of flavoring agents on carbonyl levels in e-vapor (mean  $\pm$  standard deviation, n = 5).

| Carbonyl                | Unit         | Flavoring agents (10% by volume, 1% for cinnamon flavor in VG-base) † |                     |                      |                      |                      |                      |                    |                      |
|-------------------------|--------------|-----------------------------------------------------------------------|---------------------|----------------------|----------------------|----------------------|----------------------|--------------------|----------------------|
|                         |              | Strawberry                                                            | Dragon Fruit        | Menthol              | Cinnamon             | Bavarian cream       | Sweet cream          | Bubble gum         | Graham cracker       |
| Glyoxal                 | ng/puff      | ND <sup>††</sup>                                                      | ND <sup>††</sup>    | ND <sup>††</sup>     | ND <sup>††</sup>     | ND <sup>††</sup>     | ND <sup>††</sup>     | ND <sup>††</sup>   | ND <sup>††</sup>     |
| Formaldehyde            | $\mu$ g/puff | 1.26 $\pm$ 0.116                                                      | 1.18 $\pm$ 0.035    | 0.951 $\pm$ 0.0501   | 0.672 $\pm$ 0.195    | 0.624 $\pm$ 0.0164   | 0.607 $\pm$ 0.0421   | 0.703 $\pm$ 0.0238 | 0.486 $\pm$ 0.0711   |
| Acetaldehyde            | ng/puff      | 49.0 $\pm$ 21.4                                                       | 30.5 $\pm$ 1.24     | 30.4 $\pm$ 1.96      | <LOQ <sup>††††</sup> | <LOQ <sup>††††</sup> | <LOQ <sup>††††</sup> | 30.2 $\pm$ 2.35    | <LOQ <sup>††††</sup> |
| Diacetyl                | ng/puff      | ND <sup>††</sup>                                                      | ND <sup>††</sup>    | ND <sup>††</sup>     | ND <sup>††</sup>     | 21.1 $\pm$ 11.7      | 86.4 $\pm$ 2.89      | ND <sup>††</sup>   | 34.9 $\pm$ 16.8      |
| Acetone                 | ng/puff      | <LOD <sup>†††</sup>                                                   | <LOD <sup>†††</sup> | <LOQ <sup>††††</sup> | <LOD <sup>†††</sup>  | ND <sup>††</sup>     | ND <sup>††</sup>     | ND <sup>††</sup>   | <LOD <sup>†††</sup>  |
| Acrolein                | ng/puff      | 28.4 $\pm$ 8.92                                                       | 20.9 $\pm$ 5.99     | 20.3 $\pm$ 1.81      | 29.0 $\pm$ 5.55      | ND <sup>††</sup>     | ND <sup>††</sup>     | 19.5 $\pm$ 4.18    | 131.2 $\pm$ 21.9     |
| Vanillin                | ng/puff      | ND <sup>††</sup>                                                      | ND <sup>††</sup>    | ND <sup>††</sup>     | ND <sup>††</sup>     | 177.4 $\pm$ 60.1     | 178.5 $\pm$ 65.8     | 45.2 $\pm$ 3.15    | 184.4 $\pm$ 27.0     |
| Propionaldehyde         | ng/puff      | ND <sup>††</sup>                                                      | ND <sup>††</sup>    | ND <sup>††</sup>     | ND <sup>††</sup>     | ND <sup>††</sup>     | ND <sup>††</sup>     | ND <sup>††</sup>   | ND <sup>††</sup>     |
| Acetylpropionyl         | ng/puff      | ND <sup>††</sup>                                                      | ND <sup>††</sup>    | ND <sup>††</sup>     | ND <sup>††</sup>     | ND <sup>††</sup>     | ND <sup>††</sup>     | ND <sup>††</sup>   | ND <sup>††</sup>     |
| Crotonaldehyde          | ng/puff      | 32.5 $\pm$ 1.65                                                       | ND <sup>††</sup>    | ND <sup>††</sup>     | 29.8 $\pm$ 3.86      | ND <sup>††</sup>     | 19.0 $\pm$ 0.41      | ND <sup>††</sup>   | ND <sup>††</sup>     |
| <i>n</i> -Butylaldehyde | ng/puff      | ND <sup>††</sup>                                                      | 29.4 $\pm$ 4.71     | 28.9 $\pm$ 4.01      | ND <sup>††</sup>     | ND <sup>††</sup>     | ND <sup>††</sup>     | 27.3 $\pm$ 4.81    | ND <sup>††</sup>     |
| Benzaldehyde            | ng/puff      | 29.2 $\pm$ 2.95                                                       | 31.3 $\pm$ 5.48     | 30.4 $\pm$ 5.41      | 27.8 $\pm$ 2.47      | 26.8 $\pm$ 0.58      | ND <sup>††</sup>     | 27.6 $\pm$ 2.55    | 25.0 $\pm$ 2.71      |
| Isovaleraldehyde        | ng/puff      | 16.8 $\pm$ 1.57                                                       | ND <sup>††</sup>    | ND <sup>††</sup>     | 17.3 $\pm$ 0.85      | 33.6 $\pm$ 3.73      | 24.4 $\pm$ 6.12      | ND <sup>††</sup>   | ND <sup>††</sup>     |
| <i>n</i> -Valeraldehyde | ng/puff      | 24.1 $\pm$ 3.65                                                       | ND <sup>††</sup>    | ND <sup>††</sup>     | 25.3 $\pm$ 6.08      | 19.7 $\pm$ 1.91      | 17.2 $\pm$ 0.14      | 18.9 $\pm$ 1.55    | ND <sup>††</sup>     |
| <i>o</i> -Tolualdehyde  | ng/puff      | ND <sup>††</sup>                                                      | 29.3 $\pm$ 5.37     | 32.1 $\pm$ 4.65      | 26.1 $\pm$ 7.87      | ND <sup>††</sup>     | 60.5 $\pm$ 2.34      | 62.3 $\pm$ 13.6    | ND <sup>††</sup>     |

|                        |             |                  |                  |                  |                  |                  |                  |                  |                  |
|------------------------|-------------|------------------|------------------|------------------|------------------|------------------|------------------|------------------|------------------|
| <i>p</i> -Tolualdehyde | ng/<br>puff | 18.9 ± 1.74      | ND <sup>††</sup> | 17.7 ± 0.37      | ND <sup>††</sup> | 74.2 ± 9.65      | 51.4 ± 3.22      | ND <sup>††</sup> | ND <sup>††</sup> |
| Cinnamaldehyde         | ng/<br>puff | ND <sup>††</sup> | ND <sup>††</sup> | ND <sup>††</sup> | 473.1 ± 234.     | ND <sup>††</sup> | ND <sup>††</sup> | ND <sup>††</sup> | ND <sup>††</sup> |
| <i>n</i> -Hexaldehyde  | ng/<br>puff | 205.6 ± 7.54     | 179.0 ± 36.9     | 139.4 ± 15.5     | 160.4 ± 35.9     | ND <sup>††</sup> | ND <sup>††</sup> | 154.8 ± 3.28     | ND <sup>††</sup> |
| Dimethylbenzaldehyde   | ng/<br>puff | ND <sup>††</sup> | ND <sup>††</sup> | ND <sup>††</sup> | ND <sup>††</sup> | ND <sup>††</sup> | ND <sup>††</sup> | ND <sup>††</sup> | ND <sup>††</sup> |

<sup>†</sup> 6.4W power output, 1.5 mm air hole, 90 ml puff volume, 3.8 sec puff duration, and 24 sec puff interval were used; <sup>††</sup> ND indicates non-detected; <sup>†††</sup> <LOD indicates the measurement which is below the detection limit; <sup>††††</sup> <LOQ indicates the measurement which is below the quantification limit.

## 7. E-cigarette coil setting

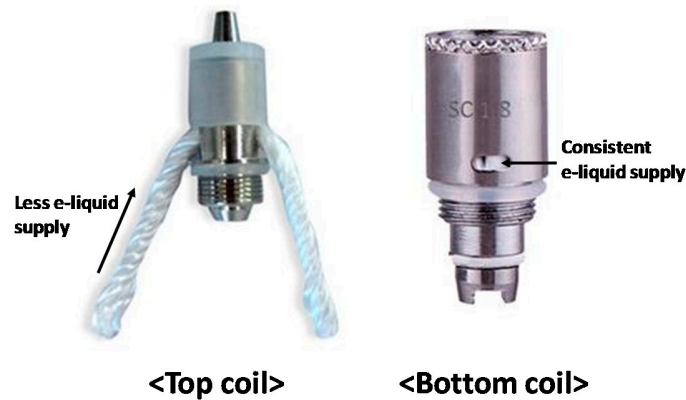

Figure S3. Example of the top and bottom coil settings (obtained from <https://www.smokshop.com/blogs/news/15508169-heads-or-tails-bottom-and-top-coils>).

## 8. Exposure Estimation

Carbonyl exposure distributions were estimated using the measured e-cigarette and reported cigarette carbonyl emission data (Table S6). Daily carbonyl exposures (weighted average) were estimated based on the reported e-cigarette and cigarette use patterns (Dautzenberg and Bricard, 2015; Jamal et al., 2018) (Table S7). 50% of e-cigarette users vaped 55-236 puffs/day, 30% of them puffed 236-346 puffs/day, and 19% of users puffed 346-600 puffs/day (Dautzenberg and Bricard, 2015). Based on the 2016 National Health Interview Survey (NHIS), 25%, 39%, 28.4%, and 7.5% of conventional cigarette users smoked 1-9, 10-19, 20-29, and more than 30 cigarettes/day respectively (Jamal et al., 2018). Estimated average daily carbonyl exposure values and corresponding standard deviations were used to generate exposure distributions using the Monte Carlo method (Figure 4 in main text, lognormal distribution,  $n=10,000$ ).

**Table S6.** Carbonyls emitted from the e-cigarette and conventional cigarette. E-cigarette carbonyl levels were measured in this study and carbonyl emissions from cigarette were adopted from Fujioka and Shibamoto (2006).

| Category    | Unit    | Formaldehyde  | Acetaldehyde  | Acrolein     | Glyoxal     | Diacetyl     |
|-------------|---------|---------------|---------------|--------------|-------------|--------------|
| E-cigarette | ng/puff | 941.9 ± 254.0 | 54.0 ± 43.5   | 54.5 ± 88.2  | 43.6 ± 97.1 | 8.37 ± 22.3  |
| Cigarette   | µg/pack | 145.5 ± 7.38  | 1756.6 ± 37.3 | 364.8 ± 16.8 | 3.16 ± 0.16 | 335.9 ± 16.5 |

**Table S7.** Estimated daily carbonyl exposures for e-cigarette and cigarette users.

| Category    | Unit   | Formaldehyde | Acetaldehyde   | Acrolein     | Glyoxal     | Diacetyl     |
|-------------|--------|--------------|----------------|--------------|-------------|--------------|
| E-cigarette | µg/day | 201.0 ± 32.2 | 11.9 ± 1.67    | 12.0 ± 1.68  | 9.60 ± 1.48 | 1.87 ± 1.06  |
| Cigarette   | µg/day | 101.7 ± 18.0 | 1224.4 ± 810.2 | 254.7 ± 60.7 | 2.22 ± 1.18 | 234.6 ± 53.9 |

## References

Dautzenberg, B.; Bricard, D. Real-Time Characterization of E-Cigarettes Use: The 1 Million Puffs Study. *J. Addict. Res. Ther.* **2015**, *6*, 1–5.



Fujioka, K.; Shibamoto, T. Determination of toxic carbonyl compounds in cigarette smoke. *Environ. Toxicol* **2006**, *21*, 47–54.

Jamal, A.; Phillips, E.; Gentzke, A.S.; Homa, D.M.; Babb, S.D.; King, B.A.; Neff, L.J. Current cigarette smoking among adults—United States, 2016. *Morbidity and Mortality Weekly Report* **2018**, *67*, 53.
